# Supplementary material for: Systematic Understanding of Anti-Aging Effect of Coenzyme Q10 on Oocyte Through a Network Pharmacology Approach
Source: Front Endocrinol (Lausanne). 2022 Feb 11;13:813772. doi: 10.3389/fendo.2022.813772 (PMC8874996; doi:10.3389/fendo.2022.813772)
Supplement: Supplementary file 2 [file Table_2.xlsx]

## Sheet: Sheet1
Supplement 2. The summary of putative targets of CoQ10
Gene symbol	Database
NDUFV3	DrugBank
SDHA	DrugBank
AKT1	CTD
APAF1	CTD
APP	CTD
ARAP2	CTD
BAD	CTD
BAK1	CTD
BAX	CTD
BCL2	CTD
BCL2L1	CTD
C1QA	CTD
C4B	CTD
CASP3	CTD
CASP8	CTD
CASP9	CTD
CAT	CTD
CCN2	CTD
COL1A1	CTD
CTSS	CTD
DAF-16	CTD
EDN1	CTD
EPS15	CTD
ETV3	CTD
FADD	CTD
FASLG	CTD
FSHR	CTD
G6PD	CTD
GAS-1	CTD
GFAP	CTD
GPT	CTD
GPX1	CTD
GSK3B	CTD
GSR	CTD
HMOX1	CTD
IL1B	CTD
IL6	CTD
IRS1	CTD
KCNJ6	CTD
LDHC	CTD
MEV-1	CTD
MMP2	CTD
MMP9	CTD
NCOA2	CTD
NDUFB6	CTD
NDUFS7	CTD
NFATC1	CTD
NFE2L2	CTD
NOS2	CTD
NOS3	CTD
OSCAR	CTD
PAH	CTD
PCNA	CTD
PIK3R1	CTD
PINK1	CTD
POU2F1	CTD
PPP2R5C	CTD
PRKN	CTD
PSD3	CTD
SKAP2	CTD
SMAD3	CTD
SNCA	CTD
SOD2	CTD
SQSTM1	CTD
TGFB1	CTD
TNF	CTD
TNFSF11	CTD
TRAF2	CTD
TRP53	CTD
PPO2	TargetNet
ALOX15	TargetNet
APOBEC3A	TargetNet
CA7	TargetNet
GPR35	TargetNet
PLIN1	TargetNet
RIPK2	TargetNet
CDC25B	TargetNet
DNMT1	TargetNet
CA6	TargetNet
CES2	TargetNet
BCL2A1	TargetNet
ALPL	TargetNet
TLR9	TargetNet
PLIN5	TargetNet
HNF4A	TargetNet
IMPDH2	TargetNet
PTGS1	TargetNet
CA5B	TargetNet
DUSP3	TargetNet
APOBEC3G	TargetNet
CES1	TargetNet
CTDSP1	TargetNet
CA5A	TargetNet
CA13	TargetNet
CA4	TargetNet
S1PR2	TargetNet
RORA	TargetNet
NR2F2	TargetNet
CHRM4	TargetNet
CA12	TargetNet
METAP2	PharmMapper
LSS	PharmMapper
HPGDS	PharmMapper
ZAP70	PharmMapper
XIAP	PharmMapper
WAS	PharmMapper
VDR	PharmMapper
TTR	PharmMapper
TTPA	PharmMapper
TRAPPC3	PharmMapper
TNNC1	PharmMapper
THRB	PharmMapper
THRA	PharmMapper
TGM3	PharmMapper
TGFB2	PharmMapper
TEK	PharmMapper
SYK	PharmMapper
SULT2B1	PharmMapper
SULT2A1	PharmMapper
SULT1E1	PharmMapper
STS	PharmMapper
SRC	PharmMapper
SHBG	PharmMapper
SERPINA1	PharmMapper
SEC14L2	PharmMapper
S100A9	PharmMapper
RXRB	PharmMapper
REN	PharmMapper
RBP4	PharmMapper
RARG	PharmMapper
RARB	PharmMapper
RARA	PharmMapper
PTPN11	PharmMapper
PTPN1	PharmMapper
PSAP	PharmMapper
PROCR	PharmMapper
PRKCQ	PharmMapper
PRKACA	PharmMapper
PPP5C	PharmMapper
PPP1CC	PharmMapper
PPCDC	PharmMapper
PPARA	PharmMapper
PNMT	PharmMapper
PLAU	PharmMapper
PIM1	PharmMapper
PGR	PharmMapper
PGF	PharmMapper
PDPK1	PharmMapper
PDK2	PharmMapper
PDE5A	PharmMapper
PDE4D	PharmMapper
PDE3B	PharmMapper
PCTP	PharmMapper
PARP1	PharmMapper
NR3C2	PharmMapper
NR3C1	PharmMapper
NR1I3	PharmMapper
NR1I2	PharmMapper
NR1H4	PharmMapper
NR1H3	PharmMapper
NR1H2	PharmMapper
NQO2	PharmMapper
NQO1	PharmMapper
MMP13	PharmMapper
MET	PharmMapper
MDM2	PharmMapper
MAPKAPK2	PharmMapper
MAPK8	PharmMapper
MAPK14	PharmMapper
MAPK1	PharmMapper
MAP2K1	PharmMapper
MAOB	PharmMapper
MAOA	PharmMapper
LCN2	PharmMapper
LCK	PharmMapper
KIT	PharmMapper
KIF11	PharmMapper
KDR	PharmMapper
JAK3	PharmMapper
ITK	PharmMapper
ITGAL	PharmMapper
INSR	PharmMapper
IL2	PharmMapper
IGF1	PharmMapper
HSPA8	PharmMapper
HSP90AB1	PharmMapper
HSP90AA1	PharmMapper
HSD17B1	PharmMapper
HSD11B1	PharmMapper
HPN	PharmMapper
HNMT	PharmMapper
HNF4G	PharmMapper
HMGCR	PharmMapper
HDAC8	PharmMapper
HCK	PharmMapper
GSTP1	PharmMapper
GSTA1	PharmMapper
GRB2	PharmMapper
GM2A	PharmMapper
GC	PharmMapper
FNTA	PharmMapper
FKBP1A	PharmMapper
FGFR1	PharmMapper
FECH	PharmMapper
FABP7	PharmMapper
FABP6	PharmMapper
FABP3	PharmMapper
F2	PharmMapper
F10	PharmMapper
ESRRG	PharmMapper
ESRRA	PharmMapper
ESR2	PharmMapper
ESR1	PharmMapper
ERBB4	PharmMapper
EGFR	PharmMapper
DUSP6	PharmMapper
DPP4	PharmMapper
DPEP1	PharmMapper
DHODH	PharmMapper
CYP2C8	PharmMapper
CTSB	PharmMapper
CTNNA1	PharmMapper
CRABP2	PharmMapper
CDK2	PharmMapper
CCNA2	PharmMapper
CASP7	PharmMapper
CASP1	PharmMapper
CA2	PharmMapper
BMP2	PharmMapper
BLVRB	PharmMapper
BCHE	PharmMapper
BACE1	PharmMapper
APOA2	PharmMapper
ALB	PharmMapper
AKR1C2	PharmMapper
AKR1C1	PharmMapper
AKR1B1	PharmMapper
ADK	PharmMapper
ADH5	PharmMapper
ADH1C	PharmMapper
ADAM17	PharmMapper
ABL1	PharmMapper
